# Supplementary material for: A chemical genetic screen in Mycobacterium tuberculosis identifies carbon-source-dependent growth inhibitors devoid of in vivo efficacy
Source: Springer Nature journal article supplement (doi:10.1038/ncomms1060), 2010-08-24
Supplement: 41467_2010_BFncomms1060_MOESM1_ESM.mol [file 41467_2010_BFncomms1060_MOESM1_ESM.mol]

  ChemDraw08091008372D

 34 38  0  0  0  0  0  0  0  0999 V2000
   -2.9630    0.4252    0.0000 N   0  0  0  0  0  0  0  0  0  0  0  0
   -2.9630   -0.3978    0.0000 C   0  0  0  0  0  0  0  0  0  0  0  0
   -2.2497   -0.8093    0.0000 C   0  0  0  0  0  0  0  0  0  0  0  0
   -1.5364   -0.3978    0.0000 C   0  0  0  0  0  0  0  0  0  0  0  0
   -1.5364    0.4252    0.0000 N   0  0  0  0  0  0  0  0  0  0  0  0
   -2.2497    0.8368    0.0000 C   0  0  0  0  0  0  0  0  0  0  0  0
   -3.6763   -0.8093    0.0000 N   0  0  0  0  0  0  0  0  0  0  0  0
   -0.8231   -0.8093    0.0000 N   0  0  0  0  0  0  0  0  0  0  0  0
   -0.7408   -1.6187    0.0000 C   0  0  0  0  0  0  0  0  0  0  0  0
    0.0686   -1.7970    0.0000 C   0  0  0  0  0  0  0  0  0  0  0  0
    0.4801   -1.0837    0.0000 N   0  0  0  0  0  0  0  0  0  0  0  0
   -0.0823   -0.4801    0.0000 C   0  0  0  0  0  0  0  0  0  0  0  0
    0.0960    0.3292    0.0000 N   0  0  0  0  0  0  0  0  0  0  0  0
   -4.3896   -0.3978    0.0000 C   0  0  0  0  0  0  0  0  0  0  0  0
    0.8779    0.5899    0.0000 C   0  0  0  0  0  0  0  0  0  0  0  0
    1.4952    0.0274    0.0000 C   0  0  0  0  0  0  0  0  0  0  0  0
    2.2908    0.2881    0.0000 C   0  0  0  0  0  0  0  0  0  0  0  0
    2.4555    1.0974    0.0000 C   0  0  0  0  0  0  0  0  0  0  0  0
    1.8382    1.6461    0.0000 C   0  0  0  0  0  0  0  0  0  0  0  0
    1.0563    1.3992    0.0000 C   0  0  0  0  0  0  0  0  0  0  0  0
    2.8944   -0.2744    0.0000 N   0  0  0  0  0  0  0  0  0  0  0  0
    3.6900   -0.0274    0.0000 C   0  0  0  0  0  0  0  0  0  0  0  0
    4.2936   -0.5761    0.0000 C   0  0  0  0  0  0  0  0  0  0  0  0
    4.1290   -1.3855    0.0000 C   0  0  0  0  0  0  0  0  0  0  0  0
    4.7326   -1.9479    0.0000 C   0  0  0  0  0  0  0  0  0  0  0  0
    5.5282   -1.6873    0.0000 C   0  0  0  0  0  0  0  0  0  0  0  0
    5.6928   -0.8779    0.0000 C   0  0  0  0  0  0  0  0  0  0  0  0
    5.0892   -0.3155    0.0000 C   0  0  0  0  0  0  0  0  0  0  0  0
   -4.4720    0.4115    0.0000 C   0  0  0  0  0  0  0  0  0  0  0  0
   -5.2813    0.5899    0.0000 C   0  0  0  0  0  0  0  0  0  0  0  0
   -5.6928   -0.1235    0.0000 C   0  0  0  0  0  0  0  0  0  0  0  0
   -5.1441   -0.7408    0.0000 C   0  0  0  0  0  0  0  0  0  0  0  0
    0.4390    1.9479    0.0000 C   0  0  0  0  0  0  0  0  0  0  0  0
    3.8547    0.7819    0.0000 O   0  0  0  0  0  0  0  0  0  0  0  0
  4  8  1  0      
 16 17  1  0      
  8  9  1  0      
 17 18  2  0      
 18 19  1  0      
  4  5  1  0      
 19 20  2  0      
 20 15  1  0      
  2  3  1  0      
 17 21  1  0      
  5  6  2  0      
 21 22  1  0      
  9 10  2  0      
 22 23  1  0      
 10 11  1  0      
 23 24  2  0      
 11 12  2  0      
 24 25  1  0      
 12  8  1  0      
 25 26  2  0      
  6  1  1  0      
 26 27  1  0      
 12 13  1  0      
 27 28  2  0      
 28 23  1  0      
 14 29  1  0      
  1  2  2  0      
  7 14  1  0      
  2  7  1  0      
 13 15  1  0      
 29 30  1  0      
 30 31  1  0      
 31 32  1  0      
 32 14  1  0      
  3  4  2  0      
 20 33  1  0      
 15 16  2  0      
 22 34  2  0      
M  END
