# Supplementary material for: A chemical genetic screen in Mycobacterium tuberculosis identifies carbon-source-dependent growth inhibitors devoid of in vivo efficacy
Source: PubMed Central journal article supplement — Nat Commun. 2010 Aug;1(5):1–8. doi: 10.1038/ncomms1060 (PMC3220188; doi:10.1038/ncomms1060), 2010-08
Supplement: ncomms1060-s1.pdf [file ncomms1060-s1.pdf]

|                                                                                                          | MIC <sub>50</sub><br>(μM) | MBC <sub>90</sub><br>(μM) | CC <sub>50</sub> _BHK21<br>(μM) | CC <sub>50</sub> _HepG2<br>(μM) | CC <sub>50</sub> _C6 glioma<br>(μM) |
|----------------------------------------------------------------------------------------------------------|---------------------------|---------------------------|---------------------------------|---------------------------------|-------------------------------------|
| <b>Compound 5</b><br>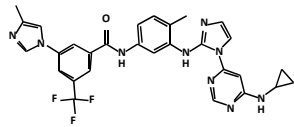   | 0.65±0.11                 | 2.5-5                     | >50                             | >50                             | >50                                 |
| <b>Compound 6</b><br>   | 0.63±0.24                 | 2.5-5                     | 13.75±0.87                      | 19.3±8.0                        | 8.10±1.55                           |
| <b>Compound 7</b><br>   | 0.11±0.04                 | 1.25-2.5                  | 3.75±0.35                       | 4.50±0.28                       | >12.5                               |
| <b>Compound 8</b><br>  | 9.67±1.45                 | n.d.                      | >50                             | >50                             | >50                                 |
| <b>Compound 9</b><br> | >20                       | n.d.                      | n.d.                            | n.d.                            | n.d.                                |

**Supplementary table S1. Initial structure-activity relationship of PI compounds.** The inhibitory activity (MIC<sub>50</sub>) was determined against *M. tuberculosis* H37Rv. The cidal activity (MBC<sub>90</sub>) and cytotoxicity (CC<sub>50</sub>) were determined after 5 days of exposure to a single dose of compound. Assays were carried out at least two times. MIC<sub>50</sub>: Minimum Inhibitory Concentration 50%; MBC<sub>90</sub>: Minimum Bactericidal Concentration 90%, CC<sub>50</sub>: Cytotoxic concentration 50%. n.d.: not determined.

|                   | <i>M. tuberculosis</i> strain |       |                           |       |                         |       |                      |       |
|-------------------|-------------------------------|-------|---------------------------|-------|-------------------------|-------|----------------------|-------|
| Glycerol:         | AH9584<br>MIC ( $\mu$ M)      |       | BE11677<br>MIC ( $\mu$ M) |       | E8133<br>MIC ( $\mu$ M) |       | W4<br>MIC ( $\mu$ M) |       |
|                   | +                             | -     | +                         | -     | +                       | -     | +                    | -     |
| <b>Compound 1</b> | 0.43                          | > 20  | 1.09                      | > 20  | 0.67                    | > 20  | 0.07                 | > 20  |
| <b>Compound 2</b> | 0.44                          | > 20  | 1.21                      | > 20  | 0.63                    | > 20  | 0.06                 | > 20  |
| <b>Rifampicin</b> | 0.005                         | 0.008 | 0.022                     | 0.022 | 0.016                   | 0.016 | <0.005               | 0.016 |
| <b>Isoniazid</b>  | 0.19                          | 0.19  | 0.20                      | 0.23  | 0.08                    | 0.08  | <0.005               | 0.14  |

**Supplementary table S2. Activity of the PI compounds against four recent clinical isolates.** The MIC<sub>50</sub> of compound 1 and 2 was tested in the presence (+) or absence (-) of glycerol. Rifampicin and isoniazid were used as reference compounds. The assay was repeated two times independently.
